# Supplementary material for: TLR2-FADS1-cPLA2-arachidonic acid axis drives necroptosis to restrict zoonotic Cryptosporidium parvum infection and mitigate intestinal injury
Source: Research Square preprint supplement (doi:10.21203/rs.3.rs-6769819/v1), 2025-06-12
Supplement: Supplementary file 1 [file 4a79f120105190ca05b9d7c8.docx]

figshare. Dataset.:https://doi.org/10.6084/m9.figshare.29169422.

SRA database:https://www.ncbi.nlm.nih.gov/sra/PRJNA1256318

MetaboLights:https://www.ebi.ac.uk/metabolights/reviewer227d70af-109b-428f-aaad-ae55027bfe90
